# Supplementary material for: Effects of Perturbation-Based Treadmill Training on Balance Performance, Daily Life Gait, and Falls in Older Adults: REACT Randomized Controlled Trial
Source: PubMed Central journal article supplement — Phys Ther. 2023 Oct 9;104(1):pzad136. doi: 10.1093/ptj/pzad136 (PMC10802992; doi:10.1093/ptj/pzad136), 2023-10-09
Supplement: ptj-2023-0064_r2_figure_s1_pzad136.pdf [file ptj-2023-0064_r2_figure_s1_pzad136.pdf]

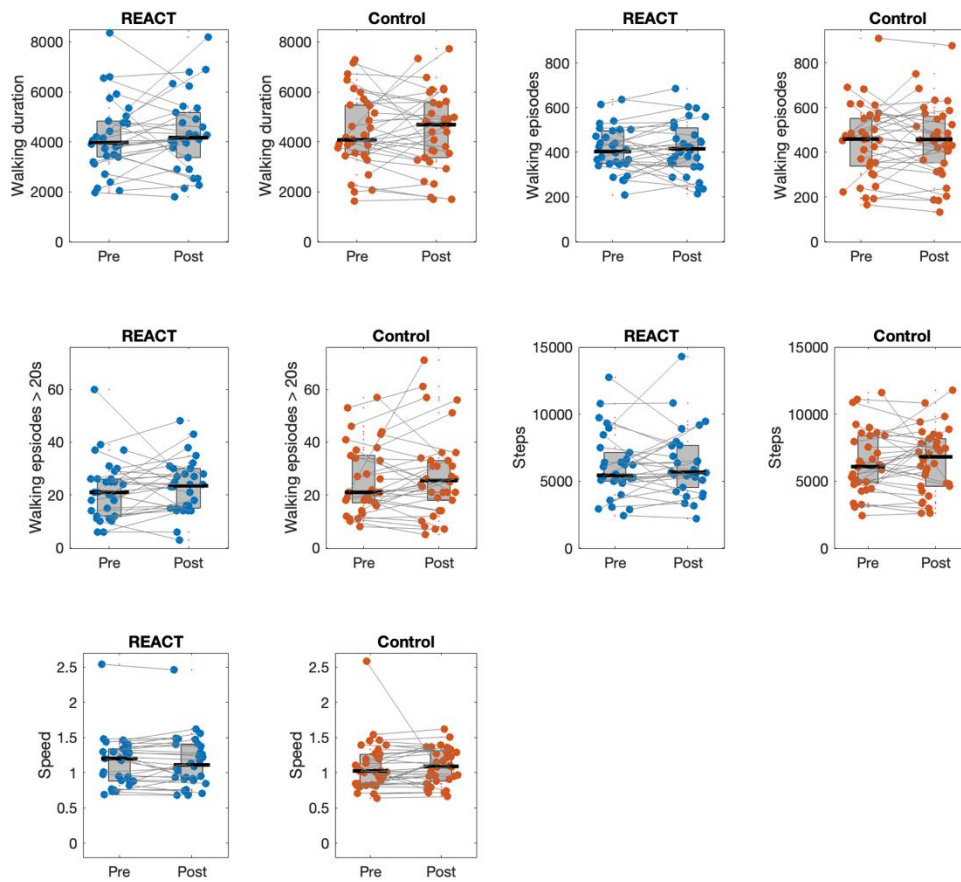

Figure S1: Physical activity outcomes from daily life walking calculated as mean of the medians per day over the week. The dots indicate individual participants, with lines connecting their pre- and post-measurement. The horizontal black lines indicate the group medians.
